# Supplementary material
Source: PubMed Central journal article supplement (PMC3158030)
Supplement: NIHMS225116-supplement-Supp_Data.pdf [file NIHMS225116-supplement-Supp_Data.pdf]

# PROTEOMICS

## Supporting Information for Proteomics

**DOI 10.1002/prca.200800034**

Niroshan Ramachandran, Karen S. Anderson, Jacob V. Raphael,  
Eugenie Hainsworth, Sahar Sibani, Wagner R. Montor, Marcin Pacek,  
Jessica Wong, Mariam Eljanne, Martin G. Sanda, Yanhui Hu,  
Tanya Logvinenko and Joshua LaBaer

**Tracking humoral responses using self assembling  
protein microarrays**
